# Supplementary material for: Viral metagenomics revealed novel betatorquevirus species in pediatric inpatients with encephalitis/meningoencephalitis from Ghana
Source: PubMed Central journal article supplement (PMC6382885; doi:10.1038/s41598-019-38975-z), 2019-02-20
Supplement: 41598_2019_38975_MOESM1_ESM.pdf [file 41598_2019_38975_MOESM1_ESM.pdf]

Supplementary information

**Viral metagenomics revealed novel betatorquevirus species in  
pediatric inpatients with encephalitis/meningoencephalitis from Ghana**

**Daniel Eibach<sup>1,2,†</sup>, Benedikt Hogan<sup>1,2,†</sup>, Nimako Sarpong<sup>3</sup>, Doris Winter<sup>1</sup>, Nicole S. Struck<sup>1</sup>, Yaw Adu-Sarkodie<sup>4</sup>, Ellis Owusu-Dabo<sup>3</sup>, Jonas Schmidt-Chanasit<sup>5,2,#</sup>, Jürgen May<sup>1,2,#</sup>, Daniel Cadar<sup>5,2,#,\*</sup>**

<sup>1</sup>Department of Infectious Disease Epidemiology, Bernhard Nocht Institute for Tropical Medicine, Hamburg, 20359, Germany

<sup>2</sup>German Center for Infection Research, Hamburg-Borstel-Lübeck-Riems, 20359, Germany

<sup>3</sup>Kumasi Centre for Collaborative Research in Tropical Medicine, Kumasi, 40080, Ghana

<sup>4</sup>Department of Clinical Microbiology, Kwame Nkrumah University of Science and Technology, Kumasi, 40080, Ghana

<sup>5</sup>Department of Arbovirology, Bernhard Nocht Institute for Tropical Medicine, Hamburg, 20359, Germany

**Supplementary Table 1.** TTMV-G1-3 and TTV-G4 species specific PCR results in healthy control.

| Sample ID | Age (in month) | Gender | TTMV-G1 | TTMV-G2 | TTMV-G3 | TTV-G4 |
|-----------|----------------|--------|---------|---------|---------|--------|
| 80268     | 23             | female | -       | -       | -       | -      |
| 80102     | 36             | Male   | -       | -       | -       | -      |
| 80597     | 36             | female | -       | -       | -       | -      |
| 80132     | 23             | male   | -       | -       | -       | -      |
| 80229     | 17             | male   | -       | -       | -       | -      |
| 80127     | 47             | male   | -       | -       | -       | -      |
| 80373     | 3              | male   | -       | -       | -       | -      |
| 80529     | 11             | male   | -       | -       | -       | -      |
| 80590     | 131            | male   | -       | -       | -       | -      |
| 80474     | 2              | female | -       | -       | -       | -      |
| 80548     | 47             | male   | -       | -       | -       | -      |
| 80540     | 108            | male   | -       | -       | -       | -      |
| 80394     | 6              | female | -       | -       | -       | -      |
| 80467     | 108            | male   | -       | -       | -       | -      |
| 80260     | 21             | female | -       | -       | -       | -      |
| 80509     | 13             | male   | -       | -       | -       | -      |
| 80005     | 0              | male   | -       | -       | -       | -      |
| 80441     | 19             | male   | -       | -       | -       | -      |
| 80138     | 84             | male   | -       | -       | -       | -      |
| 80121     | 22             | female | -       | -       | -       | -      |
| 80370     | 18             | male   | -       | -       | -       | -      |
| 80526     | 23             | male   | -       | -       | -       | -      |
| 80332     | 23             | male   | -       | -       | -       | -      |
| 80576     | 47             | male   | -       | -       | -       | -      |
| 80206     | 47             | male   | -       | -       | -       | -      |
| 80057     | 13             | female | -       | -       | -       | -      |
| 80032     | 15             | female | -       | -       | -       | -      |
| 80398     | 60             | male   | -       | -       | -       | -      |
| 80342     | 11             | female | -       | -       | -       | -      |
| 80198     | 23             | female | -       | -       | -       | -      |
| 80028     | 23             | male   | -       | -       | -       | -      |
| 80008     | 9              | female | -       | -       | -       | -      |
| 80199     | 9              | female | -       | -       | -       | -      |
| 80479     | 3              | male   | -       | -       | -       | -      |
| 80414     | 60             | female | -       | -       | -       | -      |
| 80256     | 15             | male   | -       | -       | -       | -      |
| 80106     | 47             | female | -       | -       | -       | -      |
| 80126     | 108            | female | -       | -       | -       | -      |
| 80233     | 13             | male   | -       | -       | -       | -      |
| 80202     | 11             | female | -       | -       | -       | -      |
| 80515     | 155            | female | -       | -       | -       | +      |

|       |     |        |   |   |   |   |
|-------|-----|--------|---|---|---|---|
| 80412 | 47  | male   | - | - | - | - |
| 80416 | 23  | female | - | - | - | - |
| 80574 | 144 | male   | - | - | - | - |
| 80511 | 23  | male   | - | - | - | - |
| 80171 | 23  | female | - | - | - | - |
| 80481 | 36  | male   | - | - | - | - |
| 80577 | 84  | male   | - | - | - | - |
| 80586 | 23  | female | - | - | - | + |
| 80301 | 23  | female | - | - | - | - |
| 80099 | 5   | female | - | - | - | - |
| 80218 | 36  | female | - | - | - | - |
| 80425 | 168 | male   | - | - | - | - |
| 80419 | 3   | male   | - | - | - | - |
| 80019 | 36  | female | - | - | - | + |
| 80109 | 84  | female | - | - | - | - |
| 80305 | 11  | male   | - | - | - | - |
| 80184 | 72  | female | - | - | - | - |
| 80572 | 180 | male   | - | - | - | - |
| 80203 | 47  | female | - | - | - | - |
| 80534 | 18  | female | - | - | - | - |
| 80267 | 17  | male   | - | - | - | - |
| 80037 | 18  | female | - | - | - | - |
| 80194 | 18  | female | - | - | - | - |
| 80004 | 47  | male   | - | - | - | - |
| 80090 | 19  | male   | - | - | - | - |
| 80545 | 3   | male   | - | - | - | - |
| 80292 | 19  | female | - | - | - | - |
| 80593 | 36  | female | - | - | - | - |
| 80389 | 2   | female | - | - | - | - |
| 80491 | 11  | female | - | - | - | - |
| 80382 | 2   | female | - | - | - | - |
| 80363 | 13  | female | - | - | - | - |
| 80456 | 15  | female | - | - | - | - |
| 80042 | 3   | female | - | - | - | - |
| 80252 | 15  | female | - | - | - | - |
| 80073 | 23  | female | - | - | - | - |
| 80224 | 7   | male   | - | - | - | - |
| 80265 | 7   | male   | - | - | - | - |
| 80478 | 1   | female | - | - | - | - |
| 80177 | 18  | female | - | - | - | - |
| 80217 | 23  | female | - | - | - | - |
| 80310 | 36  | female | - | - | - | - |
| 80261 | 17  | male   | - | - | - | - |
| 80523 | 9   | female | - | - | - | - |
| 80333 | 7   | female | - | - | - | - |
| 80354 | 23  | male   | - | - | - | - |
| 80088 | 19  | female | - | - | - | - |

|       |     |        |   |   |   |   |
|-------|-----|--------|---|---|---|---|
| 80244 | 72  | female | - | - | - | - |
| 80313 | 95  | female | - | - | - | - |
| 80471 | 72  | male   | - | - | - | - |
| 80516 | 36  | female | - | - | - | - |
| 80013 | 6   | male   | - | - | - | - |
| 80533 | 3   | female | - | - | - | - |
| 80457 | 3   | male   | - | - | - | - |
| 80517 | 23  | female | - | - | - | - |
| 80055 | 13  | female | - | - | - | - |
| 80445 | 47  | female | - | - | - | - |
| 80077 | 23  | female | - | - | - | - |
| 80134 | 60  | male   | - | - | - | - |
| 80375 | 2   | male   | - | - | - | - |
| 80111 | 23  | male   | - | - | - | - |
| 80361 | 23  | female | - | - | - | - |
| 80251 | 155 | male   | - | - | - | - |
| 80386 | 7   | female | - | - | - | - |
| 80246 | 95  | male   | - | - | - | - |
| 80145 | 6   | male   | - | - | - | - |
| 80431 | 23  | female | - | - | - | - |
| 80550 | 60  | female | - | - | - | - |
| 80483 | 5   | male   | - | - | - | - |
| 80315 | 2   | female | - | - | - | - |
| 80205 | 36  | male   | - | - | - | - |
| 80307 | 47  | female | - | - | - | - |
| 80041 | 19  | male   | - | - | - | - |
| 80480 | 84  | female | - | - | - | - |
| 80269 | 23  | female | - | - | - | - |
| 80427 | 72  | female | - | - | - | - |
| 80047 | 7   | male   | - | - | - | - |
| 80002 | 15  | female | - | - | - | - |
| 80512 | 5   | female | - | - | - | - |

**Supplementary Table 2.** Parasitic and/or bacterial infections detected in TTMV-G1-3 and TTV-G4 negative hospitalized febrile pediatric patients with CNS infections.

| Patient ID | Age (in months) | Gender | <i>P. falciparum</i> parasitemia / $\mu$ l | Blood culture isolate | CSF culture isolate       |
|------------|-----------------|--------|--------------------------------------------|-----------------------|---------------------------|
| 700606     | 55              | female | 179                                        | -                     | -                         |
| 700625     | 28              | female | 108114                                     | -                     | -                         |
| 700636     | 23              | female | -                                          | -                     | -                         |
| 700643     | 24              | male   | 338324                                     | -                     | -                         |
| 700657     | 29              | female | 139950                                     | -                     | -                         |
| 700658     | 18              | female | 332304                                     | -                     | -                         |
| 700670     | 76              | male   | -                                          | -                     | -                         |
| 700696     | 27              | male   | 14830                                      | -                     | -                         |
| 700703     | 20              | female | -                                          | -                     | -                         |
| 700705     | 25              | male   | 237293                                     | -                     | -                         |
| 700739     | 7               | male   | 2408                                       | -                     | -                         |
| 700766     | 16              | female | 202410                                     | -                     | -                         |
| 700771     | 7               | male   | 32432                                      | -                     | -                         |
| 700773     | 18              | male   | 228672                                     | -                     | -                         |
| 700790     | 30              | female | -                                          | -                     | -                         |
| 700809     | 47              | male   | 4118                                       | -                     | -                         |
| 700816     | 32              | male   | 177912                                     | -                     | -                         |
| 700836     | 38              | male   | 132055                                     | -                     | -                         |
| 700837     | 26              | female | 5232                                       | -                     | -                         |
| 700872     | 4               | female | -                                          | -                     | -                         |
| 700930     | 36              | female | -                                          | -                     | -                         |
| 700931     | 36              | male   | 25433                                      | -                     | -                         |
| 700959     | 37              | female | 50267                                      | -                     | -                         |
| 700981     | 63              | female | 105948                                     | -                     | -                         |
| 700985     | 26              | female | 75484                                      | -                     | -                         |
| 701004     | 30              | male   | 78631                                      | -                     | -                         |
| 701027     | 27              | male   | 403497                                     | -                     | -                         |
| 701032     | 24              | male   | 719264                                     | -                     | -                         |
| 701040     | 29              | male   | 67656                                      | -                     | <i>Klebsiella oxytoca</i> |
| 701049     | 18              | female | -                                          | -                     | -                         |
| 701050     | 19              | female | 33210                                      | -                     | -                         |
| 701054     | 24              | female | 92652                                      | -                     | -                         |
| 701059     | 25              | female | 123876                                     | -                     | -                         |
| 701063     | 47              | male   | -                                          | -                     | -                         |
| 701070     | 8               | female | 49516                                      | -                     | -                         |
| 701076     | 22              | male   | 34956                                      | -                     | -                         |
| 701077     | 28              | male   | -                                          | -                     | -                         |
| 701082     | 8               | female | -                                          | -                     | -                         |
| 701113     | 39              | male   | 166440                                     | -                     | -                         |
| 701133     | 19              | female | 46569                                      | -                     | -                         |

|        |    |        |        |   |   |
|--------|----|--------|--------|---|---|
| 701135 | 50 | female | 36354  | - | - |
| 701162 | 27 | male   | 89310  | - | - |
| 701181 | 30 | female | 432224 | - | - |
| 701222 | 60 | male   | 104340 | - | - |
| 701225 | 72 | male   | 403    | - | - |
| 701232 | 8  | female | 104064 | - | - |
| 701233 | 23 | female | -      | - | - |
| 701240 | 80 | female | 159840 | - | - |
| 701310 | 10 | female | 28980  | - | - |
| 701325 | 36 | female | -      | - | - |
| 701345 | 48 | male   | 232128 | - | - |
| 701368 | 24 | male   | 465300 | - | - |
| 701414 | 49 | male   | 17208  | - | - |
| 701538 | 14 | male   | -      | - | - |
| 701553 | 44 | female | 305890 | - | - |
| 701622 | 29 | male   | 2948   | - | - |
